# Supplementary material for: Leaf growth in early development is key to biomass heterosis in Arabidopsis
Source: PubMed Central journal article supplement (PMC7178430; doi:10.1093/jxb/eraa006), 2020-01-21
Supplement: eraa006_suppl_supplementary_figures_s1-s5_and_tables_s1-s3.pdf [file eraa006_suppl_supplementary_figures_s1-s5_and_tables_s1-s3.pdf]

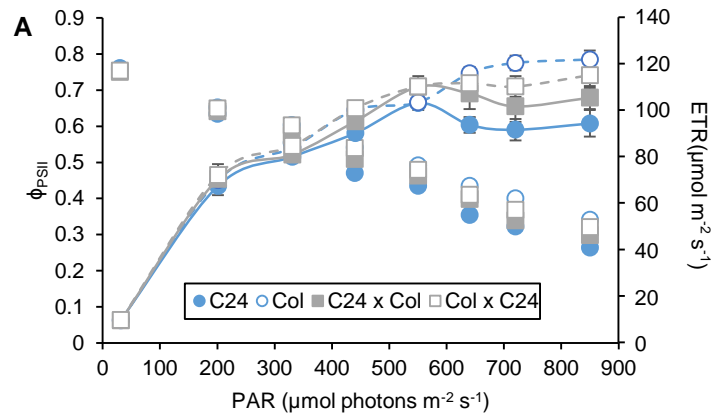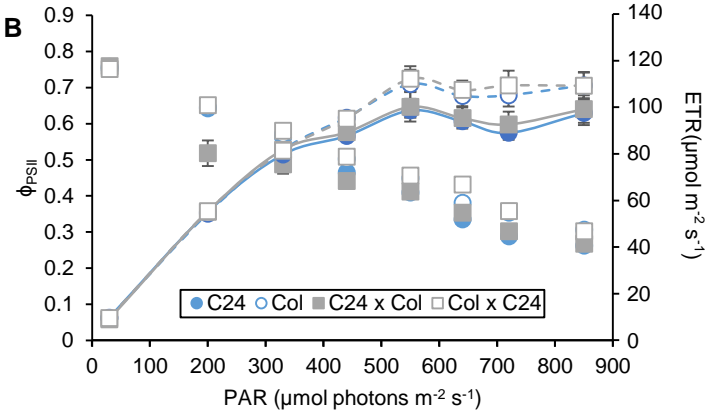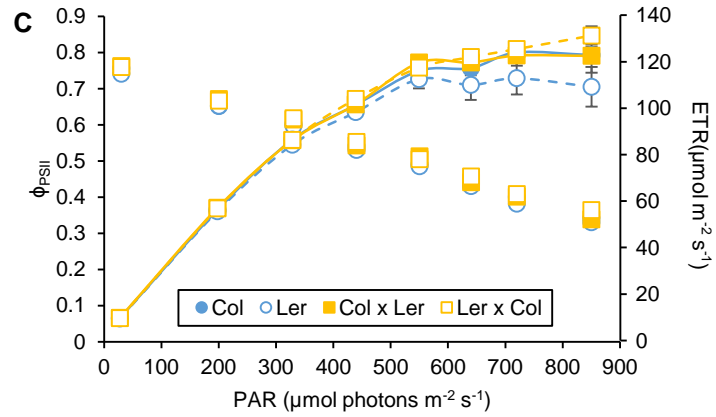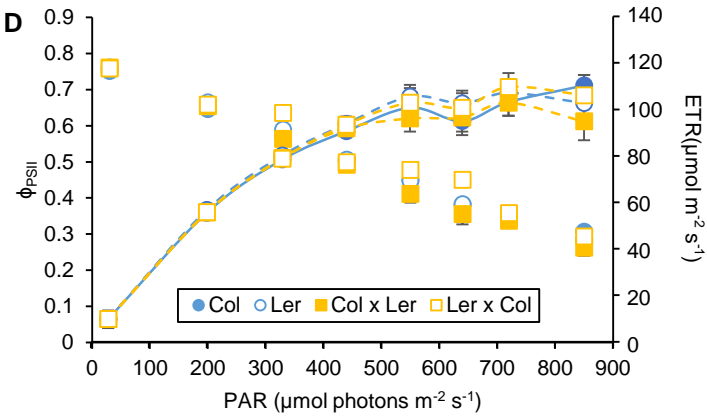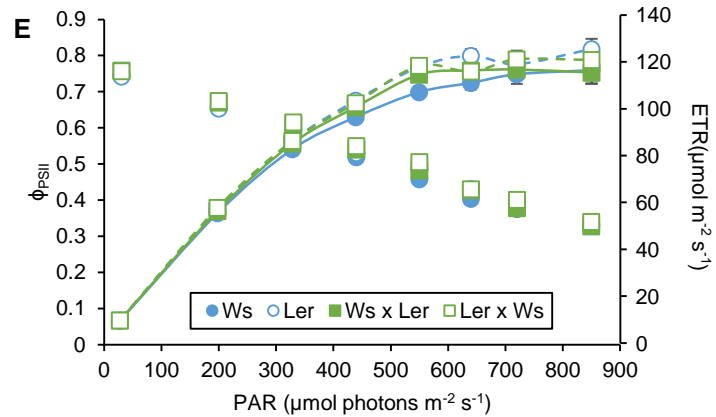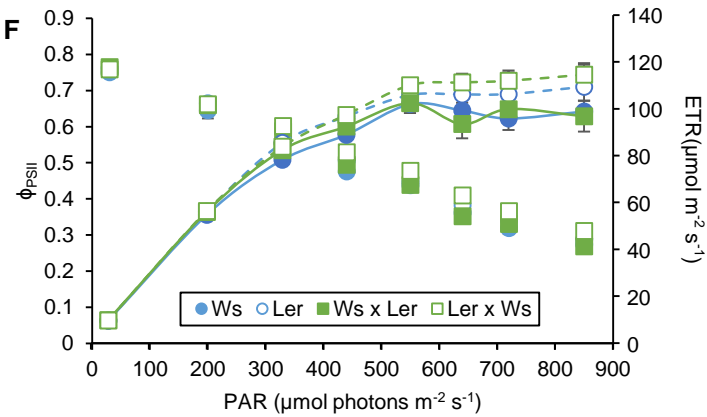

**Supplementary Figure 1. The light-response curves of the quantum yield of photosystem II ( $\phi_{PSII}$ ) and the electron transport rate (ETR) of the 6 DAS hybrid seedlings grown on MS medium either (A, C, E) with or (B, D, F) without 3% sucrose. The chlorophyll fluorescence parameters were analysed and used to calculate  $\phi_{PSII}$  as described by Genty *et al.* (1989) using a pulse amplitude modulated fluorometer (Closed FC 800-C, PSI). Each data point represents the average and SE of  $n \geq 5$ . The ETR was calculated by  $ETR = \phi_{PSII} \times PAR \times 0.5 \times 0.84$ , as described in Edwards and Baker (1993).**

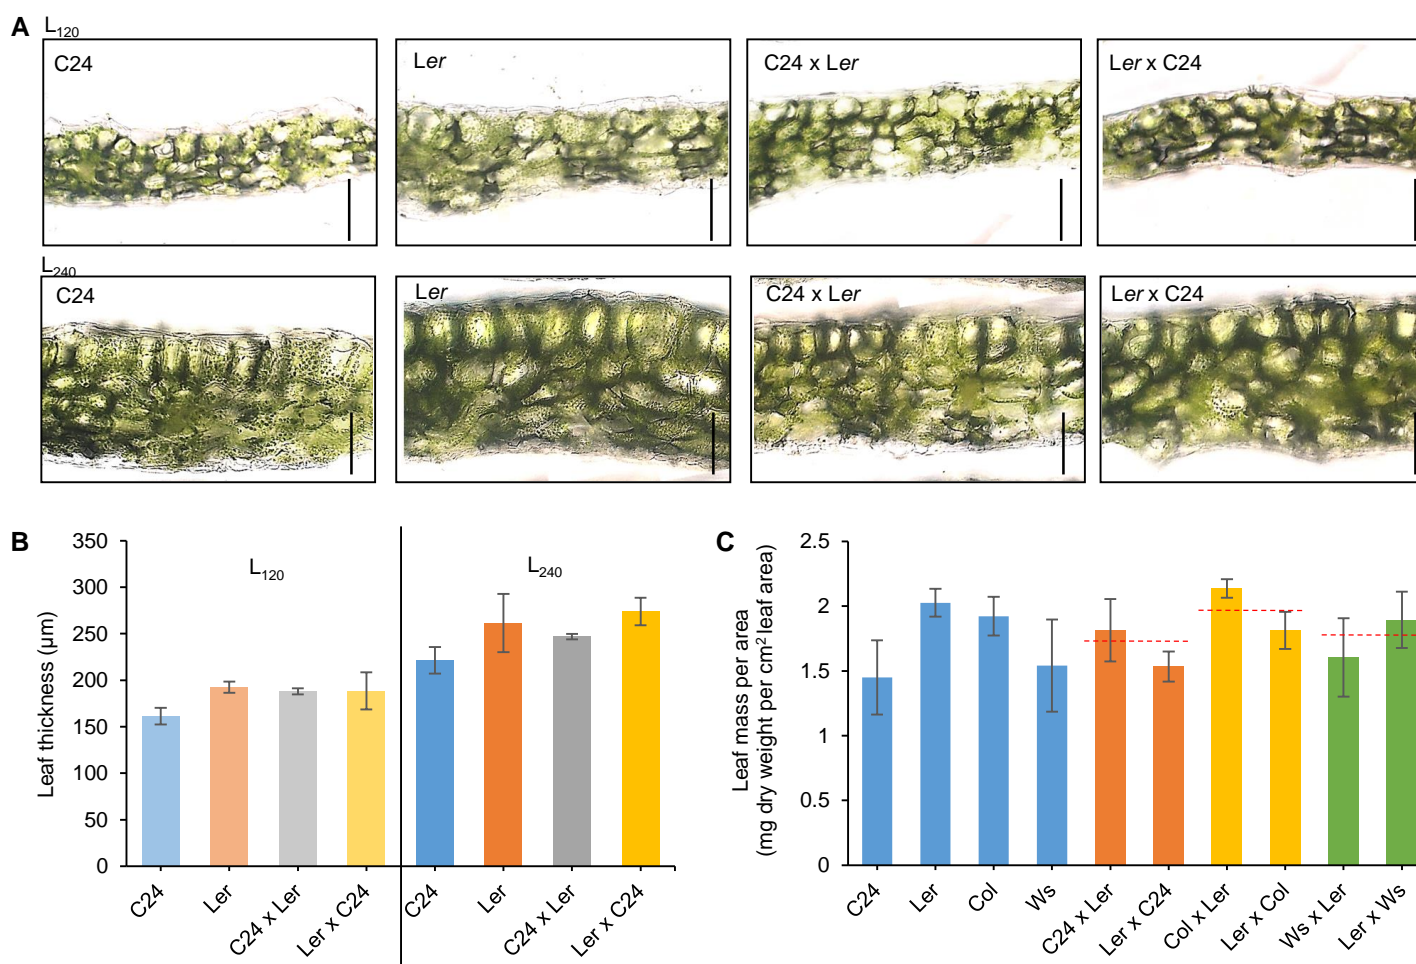

**Supplementary Figure 2. Comparisons of leaf morphology between hybrids and parents.** (A) The leaf cross-sections of the 4 week-old C24/Ler hybrid and parents grown under 16hr photoperiod under  $120 \mu\text{mol m}^{-2} \text{s}^{-1}$  (L<sub>120</sub>) or  $240 \mu\text{mol m}^{-2} \text{s}^{-1}$  (L<sub>240</sub>; representative of n=3). The largest leaves (leaves 5 and 6) were examined under a microscope (20X objective). The leaf cross-sections were presented with the central midvein aligning to the left and the adaxial epidermis to the top. Scale bar represents 200  $\mu\text{m}$ . (B) Comparisons of leaf thickness of the C24/Ler hybrid and parents. Leaf thickness was determined by measuring the distance between the upper and lower epidermis using ImageJ. Data presented were the average and SE of n=3. (C) Comparison of leaf mass per area between hybrids and parents grown under 16hr photoperiod under  $120 \mu\text{mol m}^{-2} \text{s}^{-1}$ . Data shown were calculated using data sets measured from leaves 5 or 6 of 4 week-old, soil-grown plants. Each leaf sampled was oven-dried and determined for dry weight. Leaf area was determined from the leaf image taken upon harvesting using ImageJ. Each data set represents the average and standard error of n=5 plants. No significant differences were found between hybrids and the average of the parents (ANOVA,  $p > 0.05$ ).

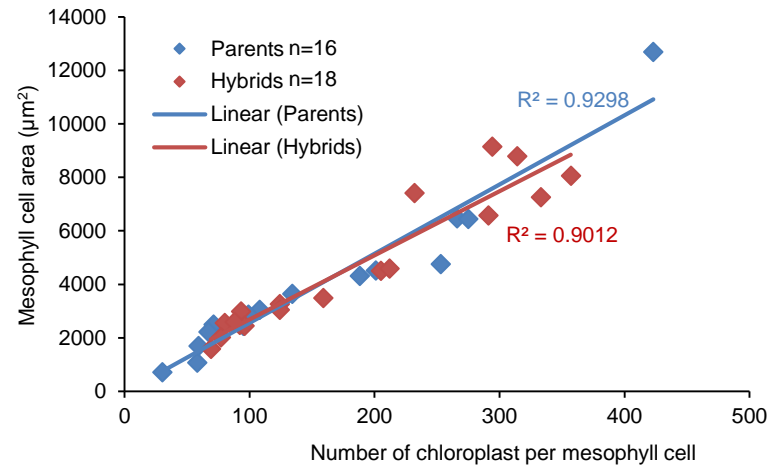

**Supplementary Figure 3. Comparisons of chloroplast content between the C24/Ler hybrids and parents.** The coefficient of definition of the regression (black line). The mesophyll cells from the cotyledons and true leaf 1/2 of C24/Ler hybrid seedlings at 10 DAS and 19 DAS, respectively, were examined individually using Nomaski light microscopy and the number of chloroplasts was counted. The cell area was determined using ImageJ.  $R^2$ : The coefficient of definition of the regression (black line). Data presented are the average and SE from number of replicates as indicated.

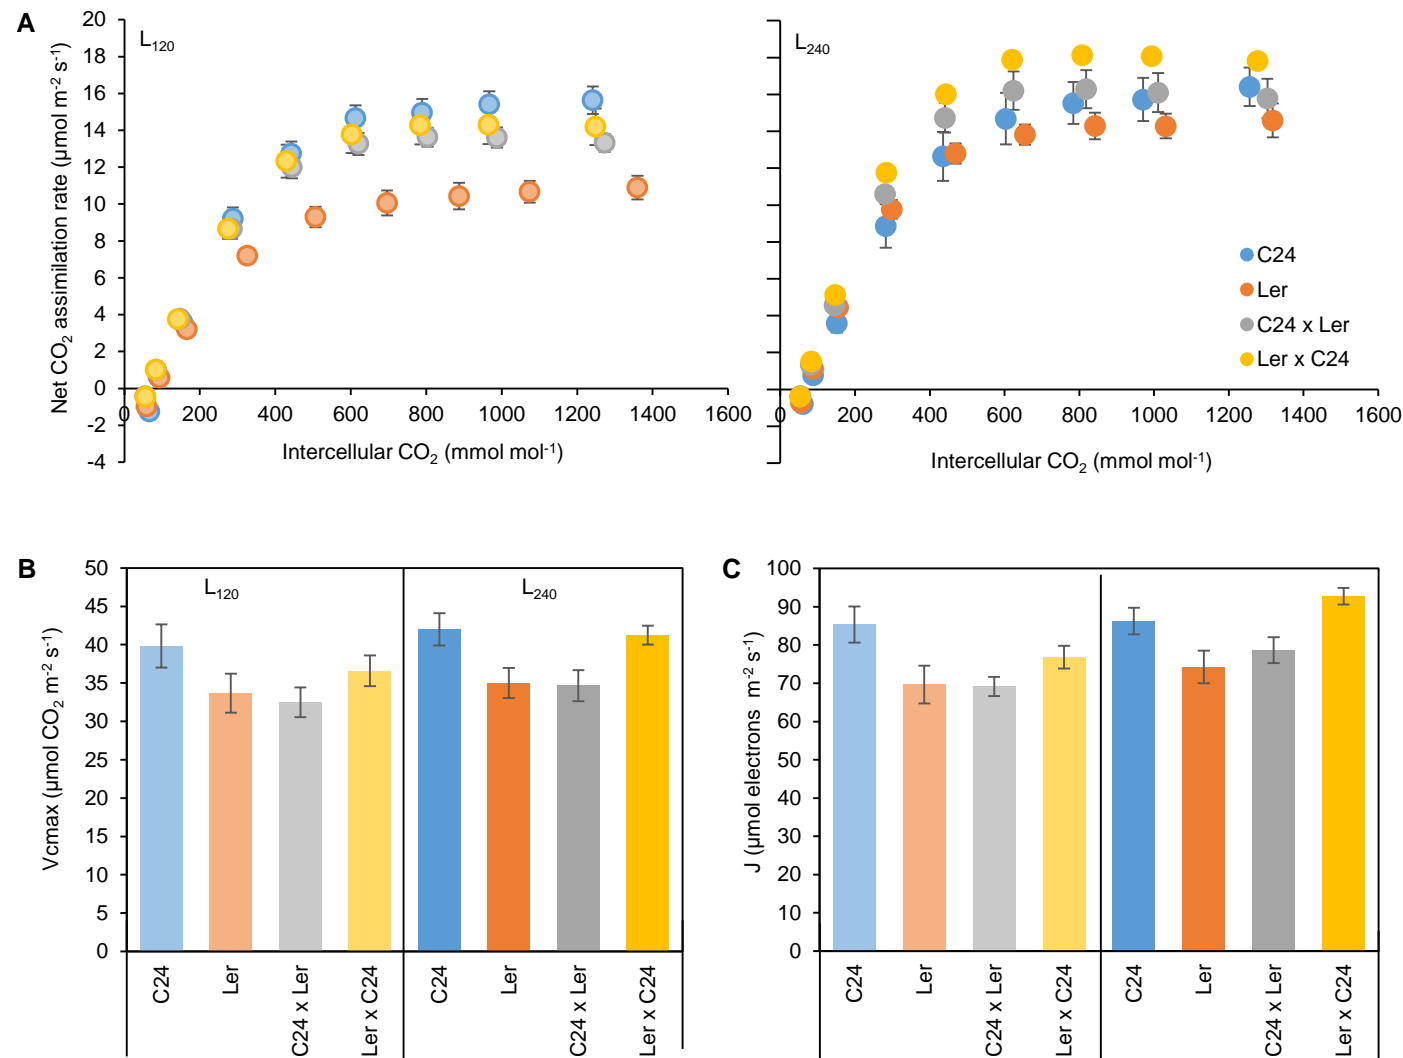

**Supplementary Figure 4. Photosynthetic parameters of 240 μmol m<sup>-2</sup> s<sup>-1</sup>-grown C24/ Ler hybrids and parents.** (A) A/Ci curves of the 3 week-old C24/Ler seedlings grown under 120 μmol m<sup>-2</sup> s<sup>-1</sup> (L<sub>120</sub>) or 240 μmol m<sup>-2</sup> s<sup>-1</sup> (L<sub>240</sub>) under a light-dark cycle of 16hr/ 8hr at 21 °C. Analyses of CO<sub>2</sub> assimilation in an ascending atmospheric CO<sub>2</sub> partial pressure were carried out under a saturating light (1000 μmol m<sup>-2</sup> s<sup>-1</sup>) using a gas exchange analyser (LI-6400XT, LICOR). Data presented were the average and SE of n ≥ 3 replicates. A: net CO<sub>2</sub> assimilation; Ci: Intercellular CO<sub>2</sub> partial pressure. (B)(C) Estimated photosynthetic parameters derived from the A/Ci curves by fitting to C3 photosynthesis model. Data represents the average and SE of maximum rate of Rubisco carboxylation (V<sub>cmax</sub>) and estimated electron transport rate (J) determined from n ≥ 3.

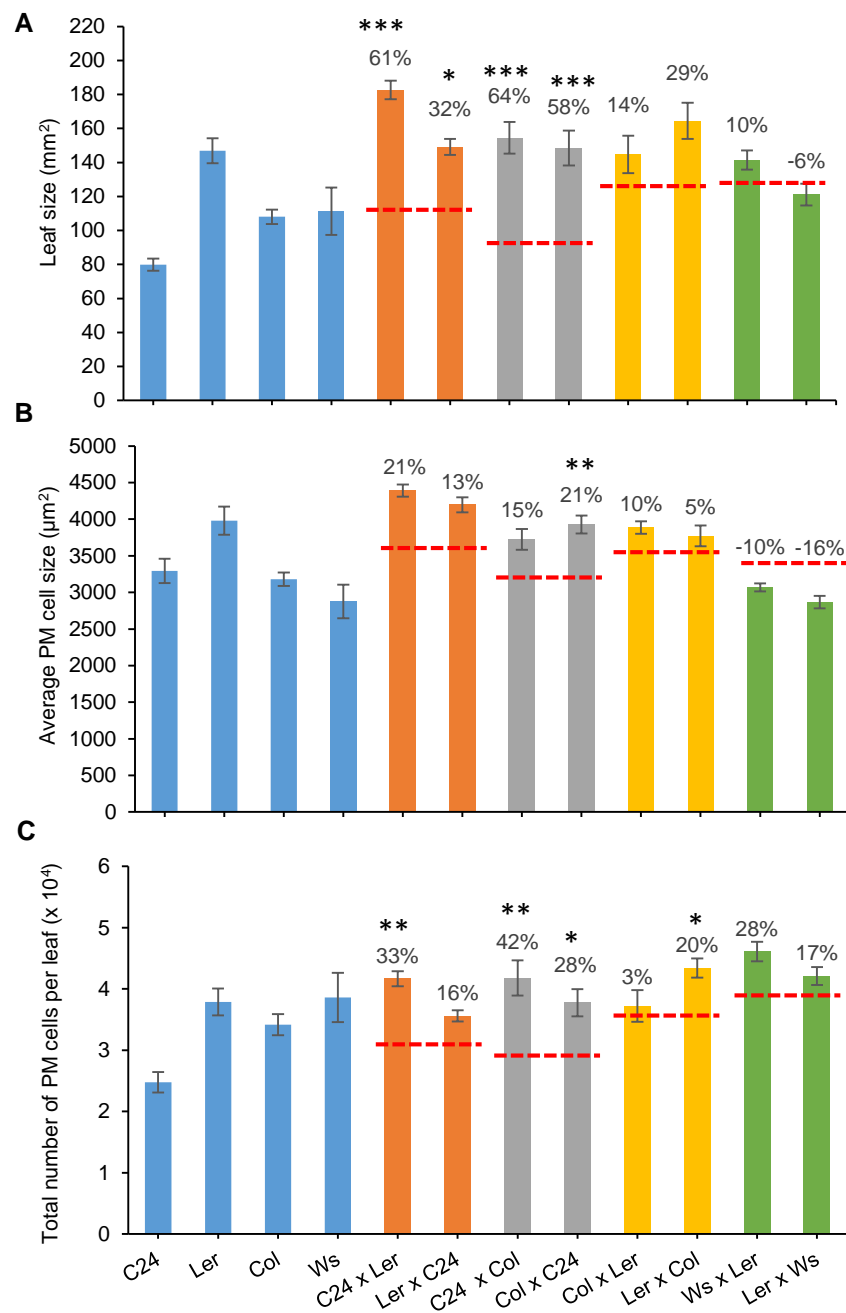

**Supplementary Figure 5. Cellular basis of leaf size differences between hybrids and parents.** The fully expanded leaves 3/4 of the 28 DAS seedlings were used. For each leaf analysed, microscopic images of palisade mesophyll layer were taken at six positions and the average cell number per image was calculated. The average area of individual palisade mesophyll cell was determined by dividing the known leaf area in a microscopic image by the average cell number per image, and the estimated total number of palisade mesophyll cells per leaf was calculated by dividing the total leaf area by the average palisade mesophyll cell area. Data presented were the average and SE of n=7-12 leaves from 3-6 plants. Values above columns represent percentage increase from the average of the parents (red dashed lines). Asterisks indicate significant increase compared with the average levels of the parents (ANOVA; \*:  $p < 0.05$ , \*\*:  $p < 0.01$ , \*\*\*:  $p < 0.001$ ). PM: palisade mesophyll.

**Supplementary Table 1.** Chlorophyll content of the 4 week-old C24/Ler hybrid seedlings grown under a 16hr-photoperiod. The L<sub>240</sub>-grown plants were grown in 120  $\mu\text{mol m}^{-2} \text{s}^{-1}$  for 10 days before transferring into 240  $\mu\text{mol m}^{-2} \text{s}^{-1}$ . Pools of rosettes (three repeats of n=3; standard error) were analysed for chlorophyll content per unit fresh weight. Statistical comparisons were carried out between hybrids and parents; and amongst plants growing under different light conditions (ANOVA). No significant differences were found ( $p > 0.05$ ). a/ b ratio: chlorophyll a to b ratio.

| Light condition  | Line      | Chl a<br>( $\mu\text{g}/ \text{mg FW}$ ) | Chl b<br>( $\mu\text{g}/ \text{mg FW}$ ) | Chl a/ b ratio  |
|------------------|-----------|------------------------------------------|------------------------------------------|-----------------|
| L <sub>120</sub> | C24       | 2.36 $\pm$ 0.09                          | 1.14 $\pm$ 0.05                          | 2.1 $\pm$ 0.02  |
|                  | Ler       | 2.44 $\pm$ 0.05                          | 1.19 $\pm$ 0.05                          | 2.1 $\pm$ 0.05  |
|                  | C24 x Ler | 2.46 $\pm$ 0.09                          | 1.20 $\pm$ 0.04                          | 2.1 $\pm$ 0.02  |
|                  | Ler x C24 | 2.49 $\pm$ 0.05                          | 1.21 $\pm$ 0.04                          | 2.1 $\pm$ 0.013 |
| L <sub>240</sub> | C24       | 2.19 $\pm$ 0.04                          | 0.99 $\pm$ 0.02                          | 2.2 $\pm$ 0.02  |
|                  | Ler       | 2.19 $\pm$ 0.09                          | 1.06 $\pm$ 0.04                          | 2.1 $\pm$ 0.13  |
|                  | C24 x Ler | 2.29 $\pm$ 0.05                          | 1.15 $\pm$ 0.11                          | 2.0 $\pm$ 0.18  |
|                  | Ler x C24 | 2.24 $\pm$ 0.06                          | 1.01 $\pm$ 0.02                          | 2.2 $\pm$ 0.01  |

**Supplementary Table 2. Leaf number and flowering time of C24/Ler hybrids and parents.** Data is the average and SE of n = 5-12 seedlings that were randomly selected from a population of n=30 plants grown under 16hr photoperiod in 120  $\mu\text{mol m}^{-2} \text{s}^{-1}$  (L<sub>120</sub>) or 240  $\mu\text{mol m}^{-2} \text{s}^{-1}$  (L<sub>240</sub>) at 21°C. Flowering time was determined by the bolting of shoot (about 1 cm). ANOVA was used to compare between each reciprocal hybrid to one of the parents. Significant differences to at least one of the parents (15 DAS *Ler*; 18 DAS C24 and 30 DAS *Ler*) are indicated by black asterisks and red asterisks indicate the hybrid is significantly different from both parents. DAS: days after sowing.

| Line             | Number of leaves |            |            |            | Days to flower        |                       |
|------------------|------------------|------------|------------|------------|-----------------------|-----------------------|
|                  | 15 DAS           | 18 DAS     | 21 DAS     | 30 DAS     | 16h/ L <sub>120</sub> | 16h/ L <sub>240</sub> |
| C24              | 6 ± 0.2          | 8 ± 0.4    | 11 ± 0.2   | 14 ± 1.5   | 31 ± 1.4              | 36 ± 0.7              |
| <i>Ler</i>       | 6 ± 0.2          | 9 ± 0.4    | 8 ± 0.4    | 8 ± 0.7    | 24 ± 1.1              | 25 ± 0.5              |
| C24 x <i>Ler</i> | 7 ± 0.3 *        | 9 ± 0.3    | 13 ± 0.5 * | 19 ± 1.7 * | 38 ± 0.5 *            | 42 ± 0.6 *            |
| <i>Ler</i> x C24 | 7 ± 0.3 *        | 10 ± 0.5 * | 12 ± 0.4 * | 21 ± 0.7 * | 39 ± 0.7 *            | 41 ± 1.8 *            |

**Supplementary Table 3. Measurements of palisade mesophyll cells of leaves 3/4 of 19 DAS and 28 DAS and leaves 5/6 of 19 DAS C24/Ler hybrid plants compared with the parents.** Number of cells was determined under a microscope (20x objective, field area: 660  $\mu\text{m}$  x 528  $\mu\text{m}$ ). Data were the average and SE from n= 6 leaves collected from three plants grown in a light/dark cycle of 16hr/ 8hr under 120  $\mu\text{E}$  at 21°C. Asterisks indicate significant difference relative to the best parent (ANOVA,  $p < 0.05$ ).

| Leaf area (cm <sup>2</sup> ) | 28 DAS<br>Leaf 3/4 | 19 DAS<br>Leaf 3/4 | 19 DAS<br>Leaf 5/6 |
|------------------------------|--------------------|--------------------|--------------------|
| C24                          | 0.79 $\pm$ 0.04    | 0.33 $\pm$ 0.03    | 0.21 $\pm$ 0.03    |
| Ler                          | 1.47 $\pm$ 0.07    | 0.43 $\pm$ 0.03    | 0.22 $\pm$ 0.03    |
| C24 x Ler                    | 1.83 $\pm$ 0.05 *  | 0.55 $\pm$ 0.03 *  | 0.37 $\pm$ 0.07 *  |
| Ler x C24                    | 1.49 $\pm$ 0.05    | 0.45 $\pm$ 0.01    | 0.24 $\pm$ 0.03    |

  

| Number of cells<br>per fixed area | 28 DAS<br>Leaf 3/4 | 19 DAS<br>Leaf 3/4 | 19 DAS<br>Leaf 5/6 |
|-----------------------------------|--------------------|--------------------|--------------------|
| C24                               | 118 $\pm$ 5        | 261 $\pm$ 15       | 214 $\pm$ 50       |
| Ler                               | 83 $\pm$ 3         | 279 $\pm$ 31       | 194 $\pm$ 43       |
| C24 x Ler                         | 87 $\pm$ 2         | 221 $\pm$ 28       | 175 $\pm$ 33       |
| Ler x C24                         | 91 $\pm$ 2         | 243 $\pm$ 5        | 201 $\pm$ 48       |

  

| Average cell size<br>( $\mu\text{m}^2$ ) | 28 DAS<br>Leaf 3/4 | 19 DAS<br>Leaf 3/4 | 19 DAS<br>Leaf 5/6 |
|------------------------------------------|--------------------|--------------------|--------------------|
| C24                                      | 3294 $\pm$ 167     | 1354 $\pm$ 72      | 506 $\pm$ 92       |
| Ler                                      | 3981 $\pm$ 191     | 1311 $\pm$ 139     | 559 $\pm$ 102      |
| C24 x Ler                                | 4391 $\pm$ 84      | 1723 $\pm$ 250     | 811 $\pm$ 203      |
| Ler x C24                                | 4198 $\pm$ 104     | 1436 $\pm$ 29      | 567 $\pm$ 114      |
